# Supplementary material for: Electrochemical dual-aptamer biosensors based on nanostructured multielectrode arrays for the detection of neuronal biomarkers
Source: Royal Society of Chemistry journal article supplement (doi:10.1039/d0nr03421e), 2020-01-01
Supplement: d0nr03421e1.pdf [file d0nr03421e1.pdf]

## Supplementary Material

### **Electrochemical dual-aptamer biosensor based on nanostructured multielectrode arrays for the detection of neuronal biomarkers**

Yuting Zhang<sup>a,b</sup>, Gabriela Figueroa-Miranda<sup>a,b</sup>, Changtong Wu<sup>a,b</sup>, Dieter Willbold<sup>c,d</sup>,  
Andreas Offenhäusser<sup>a,b</sup>, Dirk Mayer<sup>a\*</sup>

<sup>a</sup>Institute of Biological Information Processing, Bioelectronics (IBI-3),  
Forschungszentrum Jülich GmbH, 52428 Jülich, Germany

<sup>b</sup>Faculty I, RWTH Aachen, 52062 Aachen, Germany

<sup>c</sup>Institute of Complex Systems (ICS-6), Forschungszentrum Jülich GmbH, 52428  
Jülich, Germany

<sup>d</sup>Institut für Physikalische Biologie, Heinrich-Heine-Universität Düsseldorf, 40225  
Düsseldorf, Germany

E-mail addresses: [dirk.mayer@fz-juelich.de](mailto:dirk.mayer@fz-juelich.de) (D. Mayer).

## **Multielectrode arrays preparation and cleaning**

Multielectrode arrays (MEAs) were produced in an ISO 1-3 cleanroom on a borosilicate wafer with a thickness of 500  $\mu\text{m}$  and a diameter of 100 mm, shown in Fig. S1. Firstly, the wafer was spin-coated by a double resist system LOR 3b (Microchem, Newton, MA) and nLOF2070 (MicroChemicals, Ulm, Germany). The feedlines and the 64 microelectrodes pattern were defined via standard photolithography and followed by electron-beam deposition of 10 nm Ti and 200 nm Au, respectively (Pfeiffer PLS 570, Pfeiffer Vacuum, Asslar, Germany). Then, a sonication assisted lift-off step was performed in acetone to remove the photoresist layers. In order to insulate the feedlines, a polyamide (PI) passivation layer was spin-coated onto the wafer. The electrodes and contact pads were directly opened by photolithography with a mask determining their size. Finally, the wafer was diced into individual  $24 \times 24 \text{ mm}^2$  chips (9 chips/wafer) for further use. For cleaning, new MEAs chips were firstly placed in a chip holder and sonicated in acetone, isopropanol, and Milli-Q water for 5 min, respectively. Then a glass ring with a height of 5 mm and a diameter of 20 mm was adhered to the center of the cleaned chip as a reservoir by a mixture of PDMS and curing agent, Fig. S2. An oxygen plasma oven (Diener Electronic, Germany) was used for MEAs chip cleaning at an  $\text{O}_2$  pressure of 0.5 mbar, 50% power, with duration of 3 min.

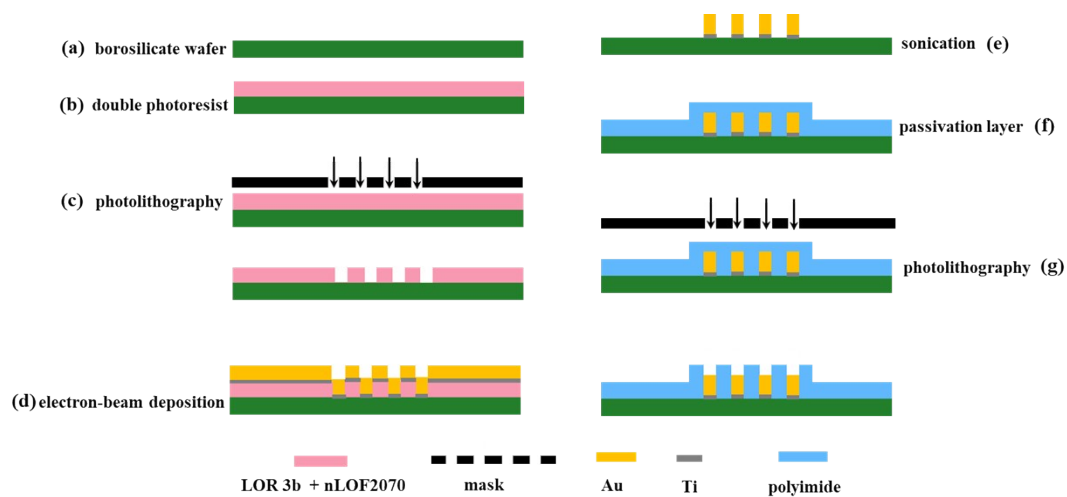

**Fig. S1** Fabrication process of multi-electrode arrays: (a–b) spin-coating of photoresists; (c) photolithography patterning of gold electrodes; (d) electron-beam deposition of Ti and Au; (d–e) lift-off process assisted by sonication; (f) spin-coating of polyimide for insulating the feedlines; (g) defining the electrode openings and contact pads by photolithography.

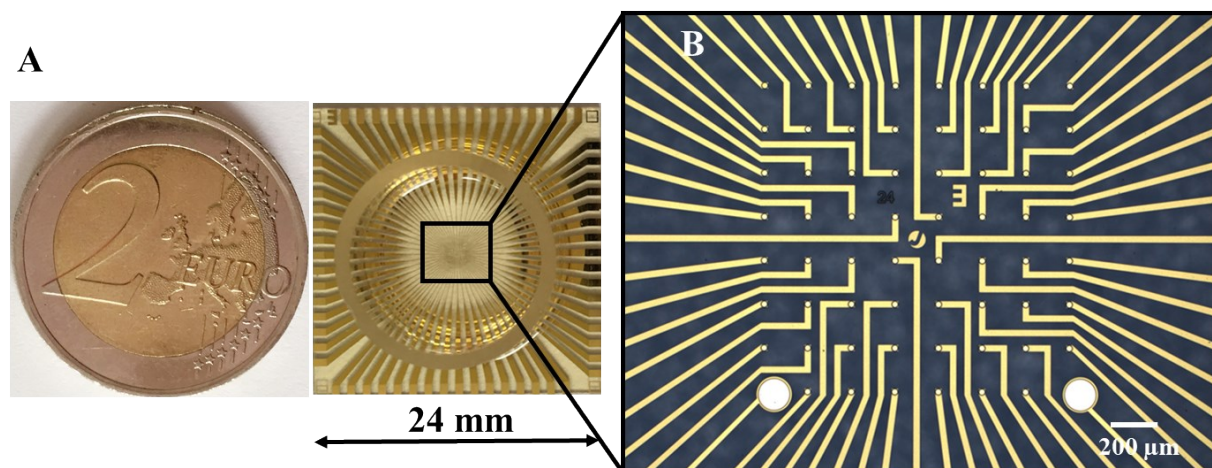

**Fig. S2** (A) Borosilicate / gold MEAs with glass ring as electrochemical reservoir cell; (B) central part of the chip with gold feedlines and 64 microelectrodes.

## Optimize aptasensor parameters

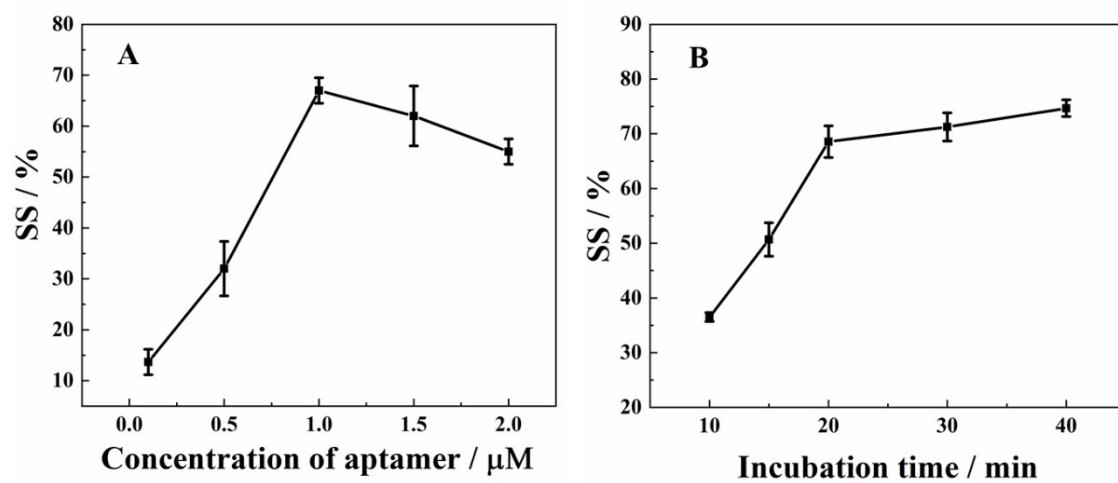

**Fig. S3** Effects of aptamer concentration (A) and A $\beta$ O incubation time (B) on the sensor signal for the detection of 1 nM A $\beta$ O in 10 mM Tris-HCl + 150 mM NaCl + 5 mM KCl.

**Table S1** Performance comparison of the proposed electrochemical aptasensor with other A $\beta$ O sensors.

| <b>Method</b>                      | <b>Linear range</b>                        | <b>Detection limit</b> | <b>Ref.</b> |
|------------------------------------|--------------------------------------------|------------------------|-------------|
| ELISA                              | 12.5 pg/mL – 200 pg/mL                     | 10.7 pg/mL             | 1           |
| Fluorescent aptasensor             | 0 $\mu$ M– 19.25 $\mu$ M                   | 3.57 nM                | 2           |
| Electrochemical biosensor          | 20 pM – 100 nM                             | 8 pM                   | 3           |
| Upconversion fluorescent           | 0.2 nM – 15 nM                             | 36 pM                  | 4           |
| Peptide-linked immunosorbent assay | 0.35 pM – 1.5 pM                           | -                      | 5           |
| Electrochemiluminescence           | 0.1 ng/mL – 10 ng/mL                       | 19.95 fg/mL            | 6           |
| Aptasensor based on 3D-GME         | 1 pM – 200 nM<br>(10 pg/mL – 2 $\mu$ g/mL) | 0.3 pM<br>3 pg/mL      | This work   |

## **The regeneration of MEA electrodes by O<sub>2</sub> plasma cleaning**

Another approach to regenerate the MEA electrodes is an O<sub>2</sub> plasma cleaning, which however acts globally on all microelectrodes of the chip. Here, a protocol of 0.5 mbar O<sub>2</sub> pressure, 50% power, and an etching time of 3 minutes was used to remove the molecules with sulfhydryl groups from the 3D-GMEs. After O<sub>2</sub> plasma cleaning, soaking in ethanol is required to reduce the oxide layer which formed during the plasma cleaning.<sup>7</sup> After O<sub>2</sub> plasma cleaning and ethanol soaking for 20 minutes, the regenerated microelectrode recovered the original surface mostly, Fig. 5B. A minor increase in the surface area can be noticed presumably caused by a slight degeneration of the electrode passivation. However, the 3D structure was not significantly altered by the O<sub>2</sub> plasma treatment. Consequently, both cleaning methods are suitable for 3D-GME cleaning. The O<sub>2</sub> plasma can be used to regenerate the entire 3D-GME arrays after usage to reset it for a second application. The electrochemical reactivation in NaOH and H<sub>2</sub>SO<sub>4</sub> can selectively regenerate individual microelectrodes due to the ability to apply the potential only to a specific electrode, which is crucial for multiple receptor modification and multiple target detection.

**Table S2** Performance comparison of the proposed electrochemical aptasensor based on 3D-GMEAs with other ATP sensors.

| <b>Method</b>                                | <b>Linear range</b>                  | <b>Detection limit</b> | <b>Ref.</b> |
|----------------------------------------------|--------------------------------------|------------------------|-------------|
| Electrochemical current rectification        | 0–5 $\mu\text{M}$                    | 114 nM                 | 8           |
| Biosensor on microelectrodes                 | 0.25 $\mu\text{M}$ – 4 $\mu\text{M}$ | 9.9 nM                 | 9           |
| Biosensor on MB aptamer                      | 0.1 $\mu\text{M}$ – 50 $\mu\text{M}$ | 0.05 $\mu\text{M}$     | 10          |
| Fluorescent sensor                           | –                                    | 5 $\mu\text{M}$        | 11          |
| Fluorescence resonance energy transfer assay | 2 $\mu\text{M}$ – 16 $\mu\text{M}$   | 1.7 $\mu\text{M}$      | 12          |
| HPLC                                         | 1 $\mu\text{M}$ – 12 $\mu\text{M}$   | –                      | 13          |
| Aptamer sensor                               | 1 $\mu\text{M}$ – 1000 $\mu\text{M}$ | 1 $\mu\text{M}$        | 14          |
| Aptasensor using IOECTs                      | 0.1 nM and 100 nM                    | 0.01 nM                | 15          |
| Aptasensor based on 3D-GME                   | 0.01 nM – 1000 nM                    | 0.002 nM               | This report |

## *Simultaneous detection of A $\beta$ O and ATP in aCSF*

In order to prove that the developed dual-aptasensor platform can selectively detect two targets when they coexist in the sample solution, the dual-aptasensor was first challenged with the non-binding target and subsequently with the matching target. After adding 10 nM ATP to the sample solution, the ACV curve of the A $\beta$ O aptamer modified 3D-GME did not exhibit a significant current reduction, Fig. S4A. However, after adding 10 nM A $\beta$ O, the current signal decreased sharply, which indicated that the presence of ATP did not affect the specificity of A $\beta$ O detection. For ATP aptamer modified 3D-GME, similar observations were made such that the addition of A $\beta$ O did not alter the ACV current while the subsequent administration of ATP causes a considerable on-signal response, Fig. S4B.

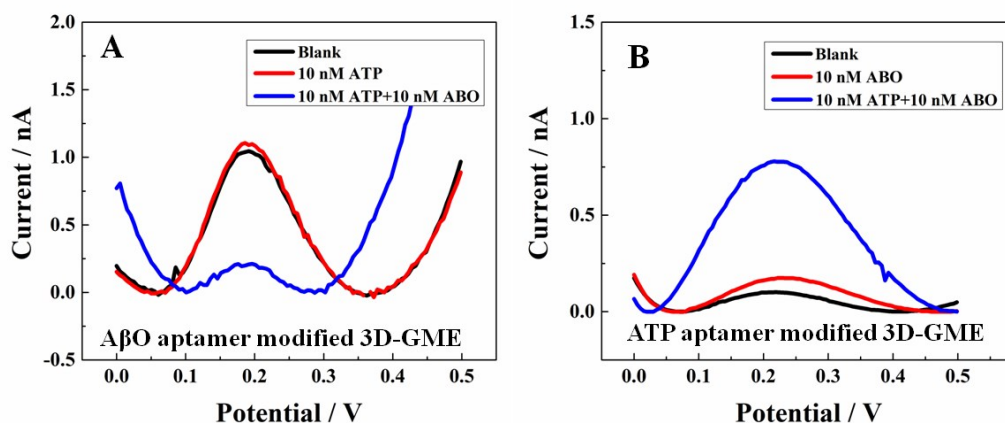

**Fig. S4** (A) ACV curves obtained from A $\beta$ O aptamer modified 3D-GMEs before (black line) and after adding firstly 10 nM ATP (red line) and secondly 10 nM A $\beta$ O (blue line); (B) ACV curves obtained from ATP aptamer modified 3D-GMEs before (black line) and after adding firstly 10 nM A $\beta$ O (red line), and secondly 10 nM ATP (blue line).



## References

1. J. A. Kim, M. Kim, S. M. Kang, K. T. Lim, T. S. Kim and J. Y. Kang, *Biosensors and Bioelectronics*, 2015, **67**, 724-732.
2. L. Zhu, J. Zhang, F. Wang, Y. Wang, L. Lu, C. Feng, Z. Xu and W. Zhang, *Biosensors and Bioelectronics*, 2016, **78**, 206-212.
3. N. Xia, X. Wang, B. Zhou, Y. Wu, W. Mao and L. Liu, *ACS applied materials & interfaces*, 2016, **8**, 19303-19311.
4. L.-F. Jiang, B.-C. Chen, B. Chen, X.-J. Li, H.-L. Liao, H.-M. Huang, Z.-J. Guo, W.-Y. Zhang and L. Wu, *Talanta*, 2017, **170**, 350-357.
5. E. G. Matveeva, J. R. Moll, M. M. Khan, R. B. Thompson and R. O. Cliff, *ACS chemical neuroscience*, 2017, **8**, 1213-1221.
6. Y. Jia, L. Yang, R. Feng, H. Ma, D. Fan, T. Yan, R. Feng, B. Du and Q. Wei, *ACS applied materials & interfaces*, 2019, **11**, 7157-7163.
7. S. Gandhi and A. Y. Abramov, *Oxidative medicine and cellular longevity*, 2012, **2012**.
8. L. Feng, A. Sivanesan, Z. Lyu, A. Offenhäusser and D. Mayer, *Biosensors and bioelectronics*, 2015, **66**, 62-68.
9. B. A. Patel, M. Rogers, T. Wieder, D. O'Hare and M. G. Boutelle, *Biosensors and Bioelectronics*, 2011, **26**, 2890-2896.
10. Y. Wang, X. He, K. Wang and X. Ni, *Biosensors and Bioelectronics*, 2010, **25**, 2101-2106.
11. H.-Z. He, V. P.-Y. Ma, K.-H. Leung, D. S.-H. Chan, H. Yang, Z. Cheng, C.-H. Leung and D.-L. Ma, *Analyst*, 2012, **137**, 1538-1540.
12. X. He, Z. Li, X. Jia, K. Wang and J. Yin, *Talanta*, 2013, **111**, 105-110.
13. M. von Papen, S. Gambaryan, C. Schuetz and J. Geiger, *Transfusion Medicine and Hemotherapy*, 2013, **40**, 109-116.
14. F. Liu, J. Zhang, R. Chen, L. Chen and L. Deng, *Chemistry & biodiversity*, 2011, **8**, 311-316.
15. Y. Liang, C. Wu, G. Figueroa-Miranda, A. Offenhäusser, D. Mayer, *Biosensors and Bioelectronics*, 2019, **144**, 111668.
